# Supplementary material for: Implementation of a Modified WHO Pediatric Procedural Sedation Safety Checklist and Its Impact on Risk Reduction
Source: Oxford University Press journal article supplement (doi:10.1542/hpeds.2016-0089), 2017-03-31
Supplement: hpeds_2016-0089supplementarydata.pdf [file hpeds_2016-0089supplementarydata.pdf]

## Supplemental Information

| PREPROCEDURE                                                                                                                                                                                                                                                                                                                                                                                                                                             | INTRAPROCEDURE                                                                                                                                                                                                                                                                | Postprocedure / Predischarge                                                                                                   |
|----------------------------------------------------------------------------------------------------------------------------------------------------------------------------------------------------------------------------------------------------------------------------------------------------------------------------------------------------------------------------------------------------------------------------------------------------------|-------------------------------------------------------------------------------------------------------------------------------------------------------------------------------------------------------------------------------------------------------------------------------|--------------------------------------------------------------------------------------------------------------------------------|
| <b>Completed by Sedation RN</b>                                                                                                                                                                                                                                                                                                                                                                                                                          | <b>Completed by Sedation RN (Pre-induction)</b>                                                                                                                                                                                                                               | <b>Completed by Sedation RN</b>                                                                                                |
| Prescreen/Risk Stratification completed and discussed with MD?<br><input type="checkbox"/> Yes <input type="checkbox"/> No                                                                                                                                                                                                                                                                                                                               | Confirm all team members in the room.<br><input type="checkbox"/> Yes <input type="checkbox"/> No                                                                                                                                                                             | Fulfills discharge criteria (Stewart Score—refer to page 2)<br><input type="checkbox"/> Yes <input type="checkbox"/> No        |
| Equipment check completed? (refer to page 2)<br><input type="checkbox"/> Yes <input type="checkbox"/> No                                                                                                                                                                                                                                                                                                                                                 | Is patient identification and timeout complete?<br><input type="checkbox"/> Yes <input type="checkbox"/> No<br>Is site verified?<br><input type="checkbox"/> Yes <input type="checkbox"/> No <input type="checkbox"/> N/A                                                     | For outpatient: Postsedation handout discussed with parent?<br><input type="checkbox"/> Yes <input type="checkbox"/> No        |
| Allergies to meds/eggs/soy? Yes <input type="checkbox"/> No <input type="checkbox"/><br>NPO guidelines met? <input type="checkbox"/> Yes <input type="checkbox"/> No<br>Consent? <input type="checkbox"/> Yes <input type="checkbox"/> No<br>Labs/results pending <input type="checkbox"/> Yes <input type="checkbox"/> No                                                                                                                               | Are all preprocedural checklist items complete?<br><input type="checkbox"/> Yes <input type="checkbox"/> No                                                                                                                                                                   | For inpatients : Handoff given by sedating RN/MD to inpatient team<br><input type="checkbox"/> Yes <input type="checkbox"/> No |
| Obesity identification<br>Weight >95 percentile<br><input type="checkbox"/> Yes <input type="checkbox"/> No BMI _____<br>(BMI= wt in kg divided by height in meters <sup>2</sup> )<br>If weight >95th percentile for age and gender, calculate BMI and dosing weight. If BMI >36 refer to GA<br>Dosing Weight Calculated?<br><input type="checkbox"/> Yes <input type="checkbox"/> No<br>(Dosing weight = actual weight + 95th percentile weight kg / 2) | START INDUCTION<br>Completed by RN (postinduction)                                                                                                                                                                                                                            | <input type="checkbox"/> For ICU patients : discharge criteria N/A                                                             |
| <b>Completed by sedation M.D.</b>                                                                                                                                                                                                                                                                                                                                                                                                                        | Achieved level of sedation documented (refer to page 2)<br><input type="checkbox"/> Yes <input type="checkbox"/> No                                                                                                                                                           |                                                                                                                                |
| Is risk stratification completed (refer to page 2)?<br><input type="checkbox"/> Yes <input type="checkbox"/> No<br>Is patient high risk or potential GA criteria (refer to page 2)?<br><input type="checkbox"/> Yes <input type="checkbox"/> No<br>ASA status is _____<br>Sedation plan discussed with team Y N<br>(mention drugs and dosages for sedation induction and maintenance)                                                                    | Location <input type="checkbox"/> ER <input type="checkbox"/> PICU<br><input type="checkbox"/> sedation services<br>Adverse event <input type="checkbox"/> Yes <input type="checkbox"/> No<br>QA (pink) sheet filled <input type="checkbox"/> Yes <input type="checkbox"/> No |                                                                                                                                |
| <b>Sedation MD to ASK procedural MD/tech</b>                                                                                                                                                                                                                                                                                                                                                                                                             |                                                                                                                                                                                                                                                                               |                                                                                                                                |
| <input type="checkbox"/> How long is the case and how painful is it?                                                                                                                                                                                                                                                                                                                                                                                     |                                                                                                                                                                                                                                                                               |                                                                                                                                |
| <input type="checkbox"/> Are there any nonroutine steps?                                                                                                                                                                                                                                                                                                                                                                                                 |                                                                                                                                                                                                                                                                               |                                                                                                                                |
| Any specific concerns related to procedure <input type="checkbox"/> Yes <input type="checkbox"/> No                                                                                                                                                                                                                                                                                                                                                      |                                                                                                                                                                                                                                                                               |                                                                                                                                |
| <b>Completed by sedation RN</b>                                                                                                                                                                                                                                                                                                                                                                                                                          |                                                                                                                                                                                                                                                                               |                                                                                                                                |
| <b>Medication Safety</b><br>Drug Double Check?<br><input type="checkbox"/> Yes <input type="checkbox"/> No<br>Maximum doses per dosing guidelines?<br><input type="checkbox"/> Yes <input type="checkbox"/> No                                                                                                                                                                                                                                           |                                                                                                                                                                                                                                                                               |                                                                                                                                |

**SUPPLEMENTAL FIGURE 3** Procedural sedation safety checklist: deep sedation patient label.

**Checklist for procedural sedation reference :**

1. **Risk stratification: High-risk patients. (discuss sedation plan with attending, ensure appropriate resources)**  
BMI > 95 percentile for age, uncontrolled asthma, severe snoring, stridor, liver or kidney disease, metabolic, mitochondrial diseases, neuromuscular diseases, severe GERD, ileus, brain tumors, altered mental status, ASA >3, craniofacial anomalies, Down syndrome, airway surgeries, history of failed sedation, severe aggression or autism, age <3 months, cardiac disease, uncontrolled seizures, severe MRCP, acute respiratory symptoms or signs.
2. **Risk stratification: Potential GA patients (consider referral to GA, PICU, anesthesia consultation or elective intubation for following cases as indicated)**  
Mediastinal mass, complex congenital heart disease, cyanotic heart disease, pulmonary hypertension, shock or hemodynamic instability, single ventricle, BMI >36, risk for difficult airway(syndromes such as Treacher Collins, Cornelia de Lange, Klippel Feil, Pierre Robin, midface hypoplasia, etc) OSA, GCS <10, risk for aspiration, elevated intracranial pressure, progressive hypotonia, ASA >4, postconceptional age <50 weeks, current history of apnea.
3. **Equipment check:**  
Functioning suction device  
BVM appropriate size and functioning  
O<sub>2</sub> available and checked. **ALL patients should receive supplemental oxygen with ETco<sub>2</sub> monitoring or direct clinical ventilation monitoring.**  
Pulsoximeter operative  
CRM, BP monitor operative  
ETco<sub>2</sub> operative if applicable  
Crash cart with airway equipment available  
Defibrillator easily available
4. **Achieved level of sedation or sedation scale**  
4 – Awake and alert  
3 – Minimally sedated: appropriate response to verbal conversation or sounds  
2 – Moderately sedated: easily aroused with light tactile stimulation or a simple verbal command  
1 – Deeply sedated: arousable only with significant physical stimulation or deep pain  
0 – Unarousable sedation or GA

**5. Discharge criteria/ Stewart scale**

| Discharge Criteria |                    |   | Pre | Post | Discharge Instruction |
|--------------------|--------------------|---|-----|------|-----------------------|
| Awake              | Fully awake        | 2 |     |      | Pt. discharged to:    |
|                    | Arousable          | 1 |     |      |                       |
|                    | Unresponsive       | 0 |     |      |                       |
| Airway             | Can cough or cry   | 2 |     |      | With whom:            |
|                    | Breathing easily   | 1 |     |      |                       |
|                    | Requires attention | 0 |     |      |                       |
| Movement           | Purposeful         | 2 |     |      | Nurse:                |
|                    | Involuntary        | 1 |     |      | Nurse:                |
|                    | Not moving         | 0 |     |      |                       |
| Total              |                    |   |     |      |                       |

**SUPPLEMENTAL FIGURE 3 Continued.**
